# Supplementary material
Source: publisher figshare collection journal article supplement (https://acs.figshare.com/ndownloader/files/14432510)
Supplement: Supplementary file 1 [file 14432510]

## Supporting Information for

# Selenidostannates and a silver-selenidostannate synthesized in deep eutectic solvents: crystal structures and thermochromic study

*Kai-Yao Wang,<sup>\*,†</sup> Hua-Wei Liu,<sup>†</sup> Shu Zhang,<sup>†</sup> Dong Ding,<sup>†</sup> Lin Cheng,<sup>§</sup> Cheng*

*Wang<sup>\*,†</sup>*

<sup>†</sup>Institute for New Energy Materials and Low-Carbon Technologies, School of Materials Science and Engineering, Tianjin Key Laboratory of Advanced Functional Porous Materials, Tianjin University of Technology, Tianjin 300384, P. R. China.

<sup>§</sup>College of Chemistry, Tianjin Normal University, Tianjin 300387, P. R. China.

# 1. Tables

**Table S1** Summary of the  $[\text{Sn}_3\text{Se}_7]_n^{2n-}$  layer-containing compounds in the literature and their band gaps and structural types.

| Compound                                                                                               | Space group  | Band gap | Type | Ref. |
|--------------------------------------------------------------------------------------------------------|--------------|----------|------|------|
| $\text{Cs}_2\text{Sn}_3\text{Se}_7$                                                                    | $C2/c$       | NA       | I    | [1]  |
| $[\text{enH}_2][\text{Sn}_3\text{Se}_7] \cdot 0.5\text{en}$                                            | $Fdd2$       | NA       | II   | [2]  |
| $(\text{TMA})_2\text{Sn}_3\text{Se}_7$                                                                 | $P2_12_12_1$ | 2.12 eV  | III  | [3]  |
| $(\text{C}_7\text{N}_4\text{OH}_{16})_2\text{Sn}_3\text{Se}_7 \cdot \text{H}_2$                        | $Pbca$       | NA       | III  | [4]  |
| $[(\text{C}_2\text{H}_5)_3\text{NH}]_2\text{Sn}_3\text{Se}_7 \cdot 0.25\text{H}_2\text{O}$             | $P2_1/n$     | 2.1 eV   | III  | [5]  |
| $(\text{NH}_3(\text{CH}_2)_8\text{NH}_3)\text{Sn}_3\text{Se}_7$                                        | $P\bar{1}$   | NA       | II   | [6]  |
| $(\text{NH}_3(\text{CH}_2)_{10}\text{NH}_3)\text{Sn}_3\text{Se}_7$                                     | $C2/c$       | NA       | II   | [6]  |
| $[\text{Mn}(\text{peha})][\text{Sn}_3\text{Se}_7]$                                                     | $P2_1/n$     | NA       | III  | [7]  |
| $[\text{Fe}(\text{phen})_3]_n(\text{Sn}_3\text{Se}_7)_n \cdot 1.25n\text{H}_2\text{O}$                 | $R\bar{3}c$  | 1.97 eV  | II   | [8]  |
| $[\text{prmmim}]_2[\text{Sn}_3\text{Se}_7]$                                                            | $P322_1$     | NA       | II   | [9]  |
| $[\text{bmmim}]_2[\text{Sn}_3\text{Se}_7]$                                                             | $P322_1$     | 2.2 eV   | II   | [9]  |
| $[\text{DBNH}]_2[\text{Sn}_3\text{Se}_7] \cdot \text{PEG}$                                             | $C2/c$       | 2.13 eV  | I    | [10] |
| $[\text{DBNH}]_3[\text{NH}_4][\text{Sn}_6\text{Se}_{14}]$                                              | $R\bar{3}$   | 2.02 eV  | I    | [10] |
| $[\text{Mn}(\text{dien})_2]\text{Sn}_3\text{Se}_7 \cdot 0.5\text{H}_2\text{O}$                         | $P2_1/n$     | 1.89 eV  | III  | [11] |
| $[\text{Fe}(\text{tatda})]\text{Sn}_3\text{Se}_7$                                                      | $P2_1/n$     | 1.93 eV  | II   | [11] |
| $[\text{Mn}(\text{en})_{2.5}(\text{en-Me})_{0.5}][\text{Sn}_3\text{Se}_7]$                             | $P2_1/c$     | NA       | III  | [12] |
| $[\text{Mn}(\text{en})_3]\text{Sn}_3\text{Se}_7$                                                       | $P2_1/n$     | 1.99 eV  | III  | [13] |
| $[\text{Mn}(\text{dien})_2]\text{Sn}_3\text{Se}_7 \cdot \text{H}_2\text{O}$                            | $P2_1/n$     | 2.04 eV  | III  | [13] |
| $(\text{H}^+ - \text{DBN})_2[\text{Sn}_3\text{Se}_7]$                                                  | $Cmc2_1$     | 2.02 eV  | II   | [14] |
| $[(\text{CH}_3)_3\text{N}(\text{CH}_2)_2\text{OH}]_2[\text{Sn}_3\text{Se}_7] \cdot \text{H}_2\text{O}$ | $P2_1/n$     | NA       | III  | [15] |
| $[(\text{CH}_3)_3\text{N}(\text{CH}_2)_2\text{CH}_3]_2[\text{Sn}_3\text{Se}_7]$                        | $Pbca$       | 2.35 eV  | III  | [15] |
| $(\text{BuMe}_3\text{N})_2[\text{Sn}_3\text{Se}_7]$                                                    | $C2/c$       | NA       | I    | [16] |

**Table S2** Summary of the Ag-Sn-Se compounds and their band gaps in the literature.

| Compound                                                                                                                 | Space group    | Band gap | Ref. |
|--------------------------------------------------------------------------------------------------------------------------|----------------|----------|------|
| $\text{K}_2\text{Ag}_2\text{SnSe}_4$                                                                                     | $P2/c$         | 1.8 eV   | [17] |
| $\text{K}_2\text{Ag}_2\text{Sn}_2\text{Se}_6$                                                                            | $P4/mcc$       | NA       | [18] |
| $\beta\text{-Ag}_8\text{SnSe}_6$                                                                                         | $Pmn2_1$       | NA       | [19] |
| $\text{BaAg}_2\text{SnSe}_4$                                                                                             | $I222$         | 0.2 eV   | [20] |
| $\text{La}_3\text{AgSnSe}_7$                                                                                             | $P6_3$         | NA       | [21] |
| $\text{A}_3\text{AgSn}_3\text{Se}_8$ (A = Rb, K)                                                                         | $P4/nbm$       | 1.8 eV   | [22] |
| $\text{K}_3\text{AgSn}_3\text{Se}_8$                                                                                     | $P4/nbm$       | 1.8 eV   | [23] |
| $[(\text{Me})_2\text{NH}_2]_{0.75}[\text{Ag}_{1.25}\text{SnSe}_3]$                                                       | $P\bar{4}2_1m$ | 1.85 eV  | [24] |
| $[\text{bmmim}]_7[\text{AgSn}_{12}\text{Se}_{28}]$                                                                       | $P\bar{1}$     | 2.2 eV   | [25] |
| $(\text{NH}_4)_4\text{Ag}_{12}\text{Sn}_7\text{Se}_{22}$                                                                 | $C2/c$         | 1.21 eV  | [26] |
| $[\text{CH}_3\text{NH}_3]_2[\text{H}_3\text{O}]\text{Ag}_5\text{Sn}_4\text{Se}_{12} \cdot \text{C}_2\text{H}_5\text{OH}$ | $P\bar{4}2_1m$ | 1.80 eV  | [27] |

## 2. Figures

### 2.1 Synthesis

#### Compound 1:

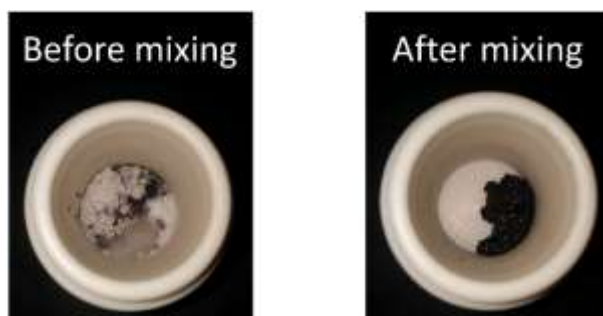

**Figure S1.** Photographs of the reactants, i.e. Sn, Se,  $[\text{NH}_2(\text{CH}_3)_2]\text{Cl}$ , urea (without  $\text{N}_2\text{H}_4\cdot\text{H}_2\text{O}$ ), before and after being mixed for the synthesis of compound **1**. The transforming from bulk solid reactants to a viscous liquid mixture after being stirred indicates the formation of  $[\text{NH}_2(\text{CH}_3)_2]\text{Cl}$ -urea DES.

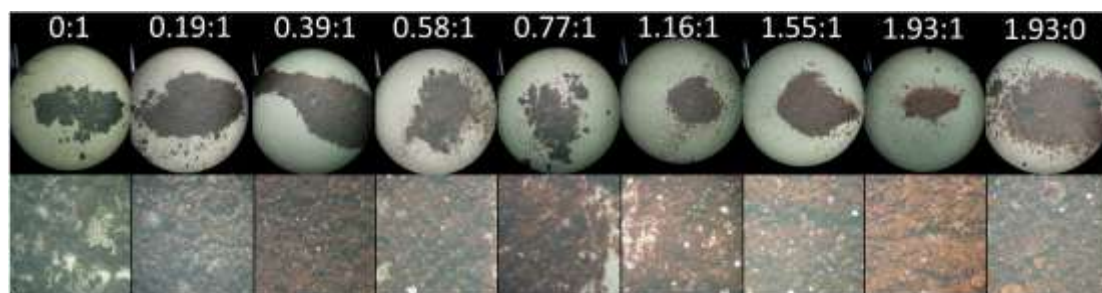

**Figure S2.** Photographs of the products obtained from the optimizing reactions for **1** with different  $\text{N}_2\text{H}_4\cdot\text{H}_2\text{O}$ :urea molar ratios at 160 °C. Top line: products washed by distilled water; bottom line: magnified imaging of the products.

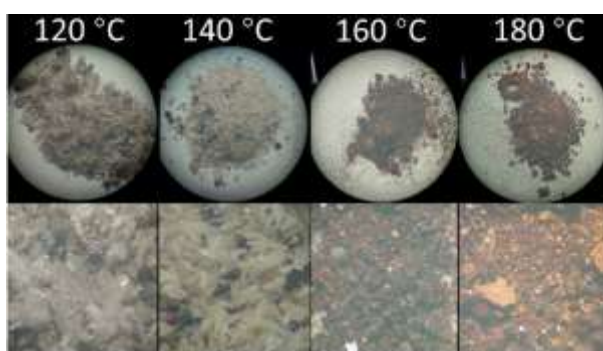

**Figure S3.** Photographs of the products obtained from the optimizing reactions for **1** ( $\text{N}_2\text{H}_4\cdot\text{H}_2\text{O}$ :urea = 0.58:1) performed at different temperatures. Top line: products washed by distilled water; bottom line: magnified imaging of the products.

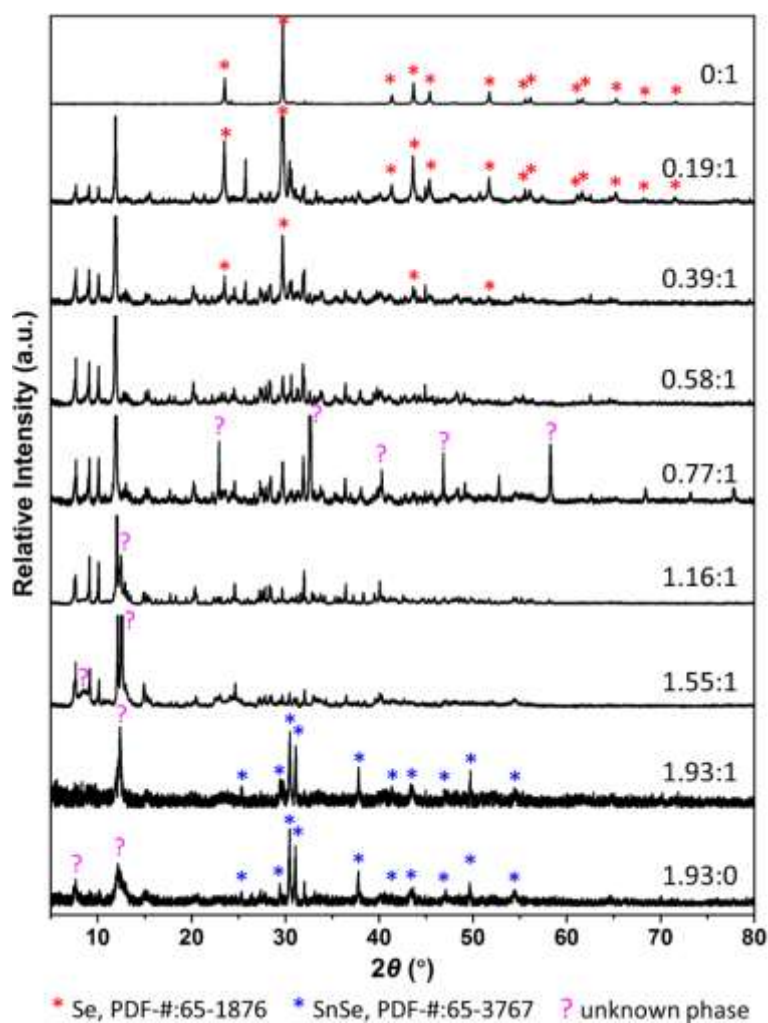

**Figure S4.** Powder XRD patterns for the products from optimizing reactions for **1** with different  $\text{N}_2\text{H}_4 \cdot \text{H}_2\text{O}:\text{urea}$  ratio at 160 °C.

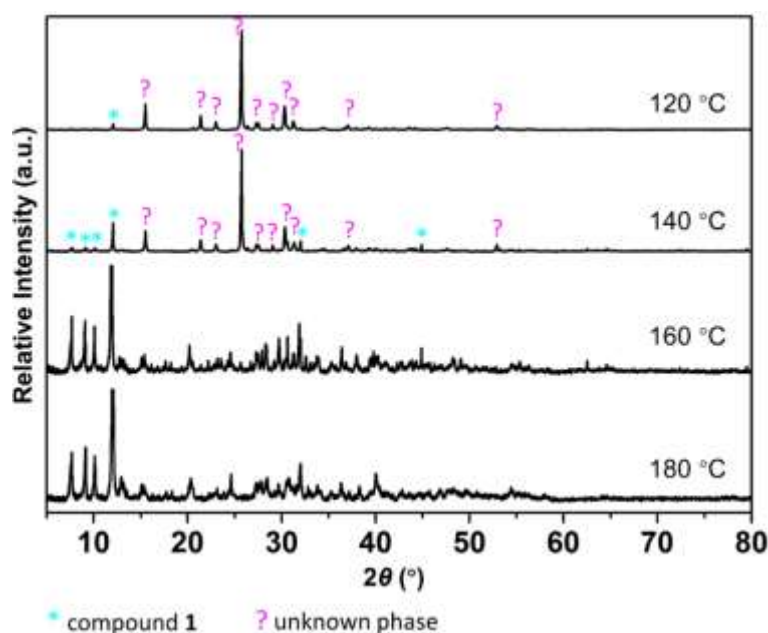

**Figure S5.** Powder XRD patterns for the products obtained from the optimizing reactions for **1** performed at different temperatures. The molar ratio of  $\text{N}_2\text{H}_4 \cdot \text{H}_2\text{O}:\text{urea}$  for all the reactions is 0.58:1.

**Compound 2:**

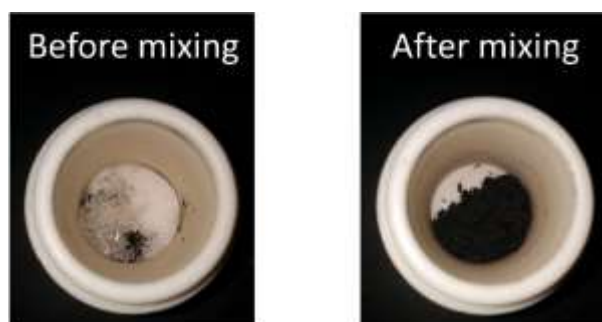

**Figure S6.** Photographs of the reactants, i.e. Sn, Se,  $[\text{NH}_3\text{CH}_2\text{CH}_3]\text{Cl}$ , urea (without  $\text{N}_2\text{H}_4\cdot\text{H}_2\text{O}$ ), before and after being mixed for the synthesis of compound **2**. The transforming from bulk solid reactants to a viscous liquid mixture after being stirred indicates the formation of  $[\text{NH}_2(\text{CH}_3)_2]\text{Cl}$ -urea DES.

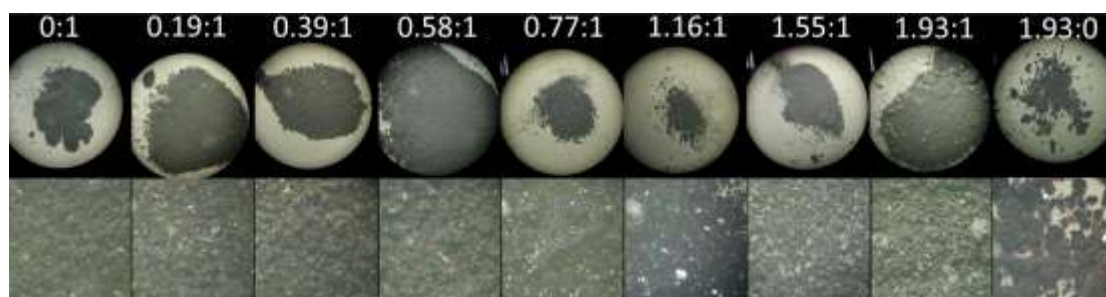

**Figure S7.** Photographs of the products obtained from the optimizing reactions for **2** with different  $\text{N}_2\text{H}_4\cdot\text{H}_2\text{O}$ :urea molar ratios at 160 °C. Top line: products washed by distilled water; bottom line: magnified imaging of the products.

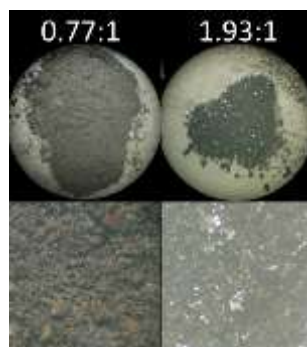

**Figure S8.** Photographs of the products obtained from the optimizing reactions for **2** at 160 °C in absence of  $[\text{NH}_3\text{CH}_2\text{CH}_3]\text{Cl}$ . The  $\text{N}_2\text{H}_4\cdot\text{H}_2\text{O}$ :urea molar ratios was tuned to 0.77:1 and 1.93:0 respectively. Top line: products washed by distilled water; bottom line: magnified imaging of the products.

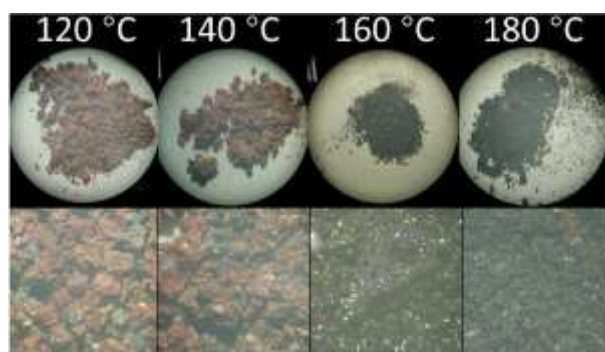

**Figure S9.** Photographs of the products obtained from the optimizing reactions for **2** ( $\text{N}_2\text{H}_4\cdot\text{H}_2\text{O}:\text{urea} = 0.77:1$ ) performed at different temperatures. Top line: products washed by distilled water; bottom line: magnified imaging of the products.

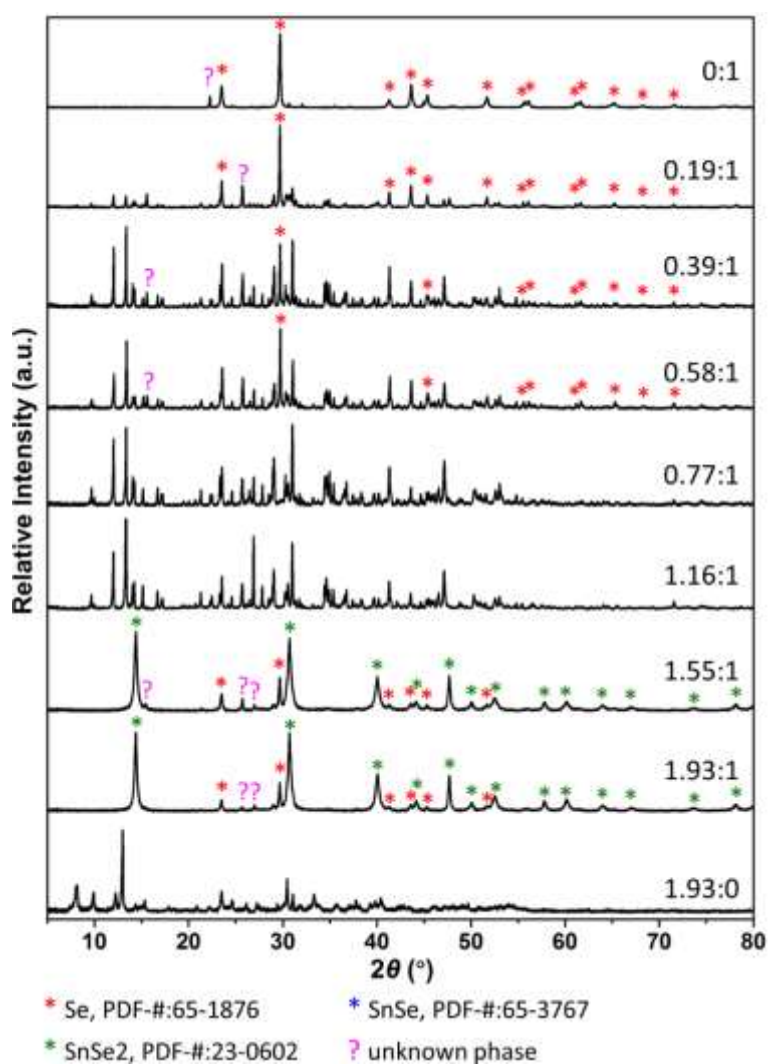

**Figure S10.** Powder XRD patterns for the products from optimizing reactions for **2** with different  $\text{N}_2\text{H}_4\cdot\text{H}_2\text{O}:\text{urea}$  ratio at 160 °C.

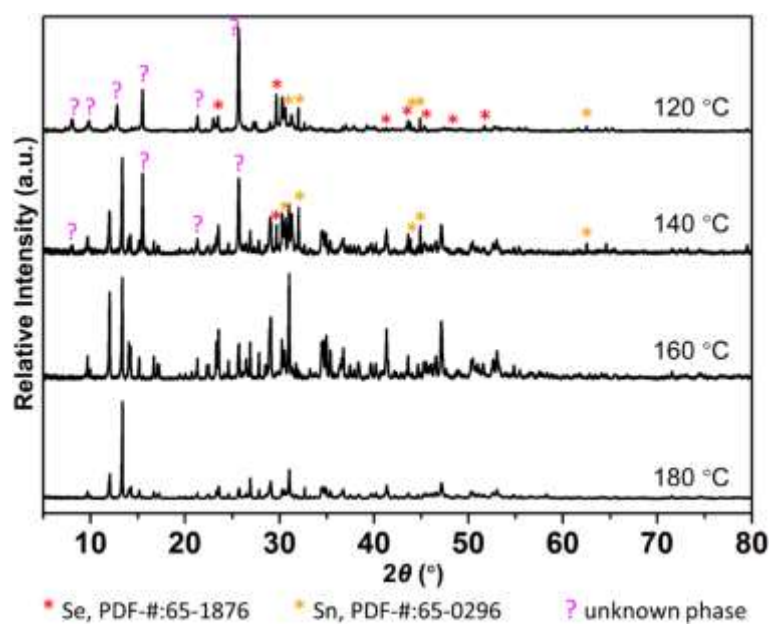

**Figure S11.** Powder XRD patterns for the products obtained from the optimizing reactions for **2** performed at 120-180 °C. The molar ratio of  $\text{N}_2\text{H}_4 \cdot \text{H}_2\text{O}$ :urea for all the reactions is 0.77:1.



**Compound 4:**

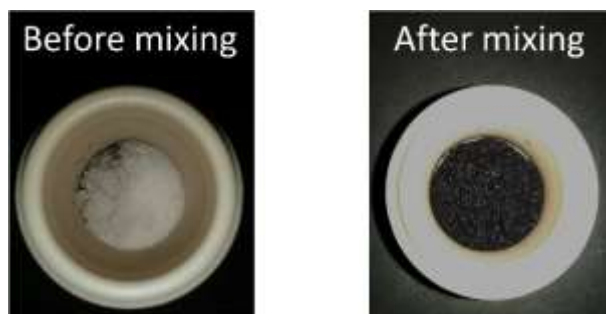

**Figure S12.** Photographs of the reactants, i.e. Sn, Se,  $[\text{NH}(\text{CH}_3)_3]\text{Cl}$ , urea (without  $\text{N}_2\text{H}_4\cdot\text{H}_2\text{O}$ ), before and after being mixed for the synthesis of compound **4**. The transforming from bulk solid reactants to a viscous liquid mixture after being stirred indicates the formation of  $[\text{NH}(\text{CH}_3)_3]\text{Cl}$ -urea DES.

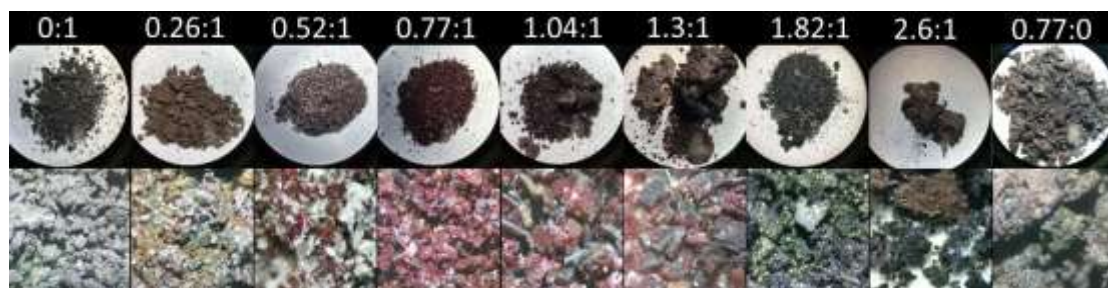

**Figure S13.** Photographs of the products obtained from the optimizing reactions for **4** with different  $\text{N}_2\text{H}_4\cdot\text{H}_2\text{O}$ :urea molar ratios at 160 °C. Top line: products washed by distilled water; bottom line: magnified imaging of the products.

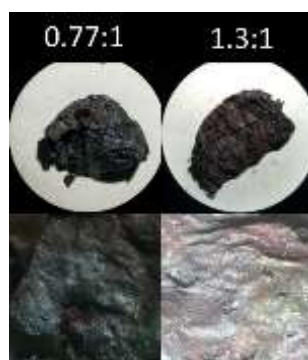

**Figure S14.** Photographs of the products obtained from the optimizing reactions for **4** at 160 °C in absence of  $[\text{NH}_3(\text{CH}_3)_3]\text{Cl}$ . The  $\text{N}_2\text{H}_4\cdot\text{H}_2\text{O}$ :urea molar ratios was tuned to 0.77:1 and 1.3:0 respectively. Top line: products washed by distilled water; bottom line: magnified imaging of the products.



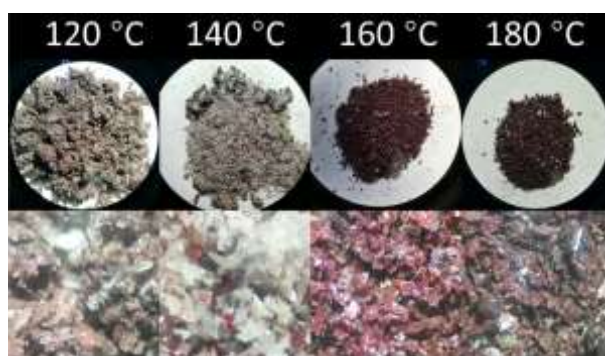

**Figure S15.** Photographs of the products obtained from the optimizing reactions for **4** ( $\text{N}_2\text{H}_4 \cdot \text{H}_2\text{O}:\text{urea} = 0.77:1$ ) performed at different temperatures. Top line: products washed by distilled water; bottom line: magnified imaging of the products.

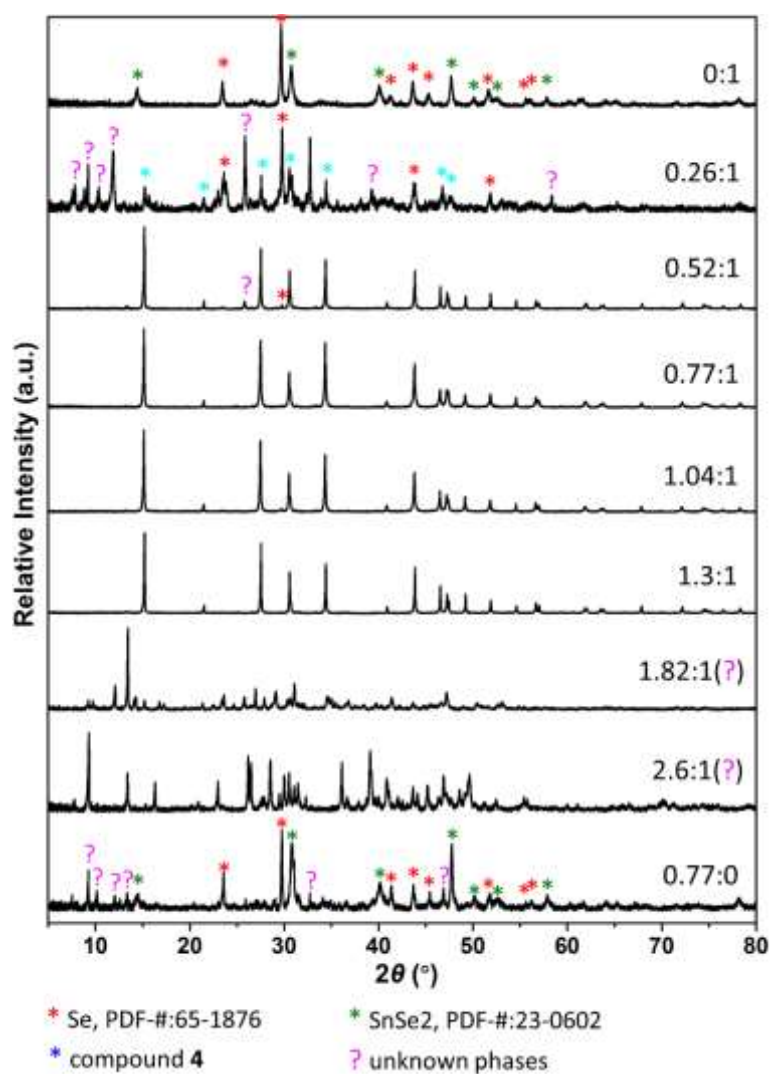

**Figure S16.** Powder XRD patterns for the products from optimizing reactions for **4** with different  $\text{N}_2\text{H}_4 \cdot \text{H}_2\text{O}:\text{urea}$  ratio at 160 °C.

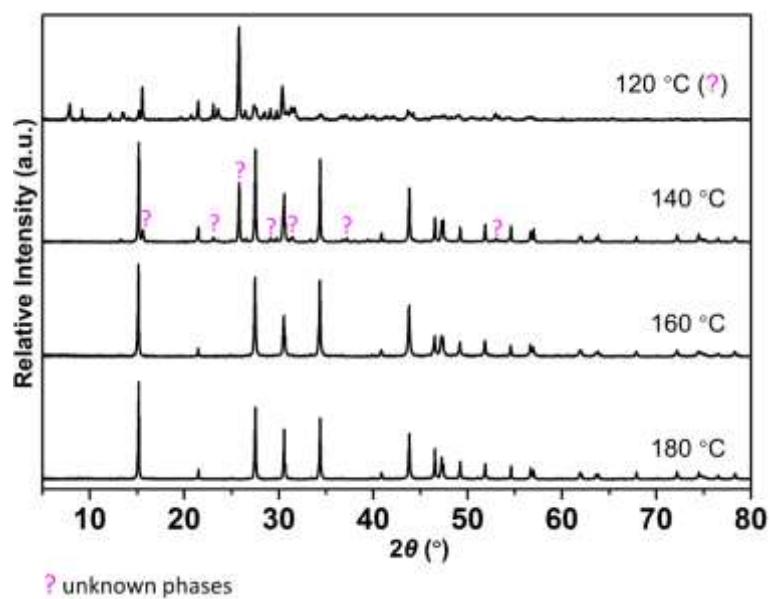

**Figure S17.** Powder XRD patterns for the products obtained from the optimizing reactions for **4** performed at 120-180 °C. The molar ratio of  $\text{N}_2\text{H}_4 \cdot \text{H}_2\text{O}$ :urea for all the reactions is 0.77:1.

## 2.2 Structures

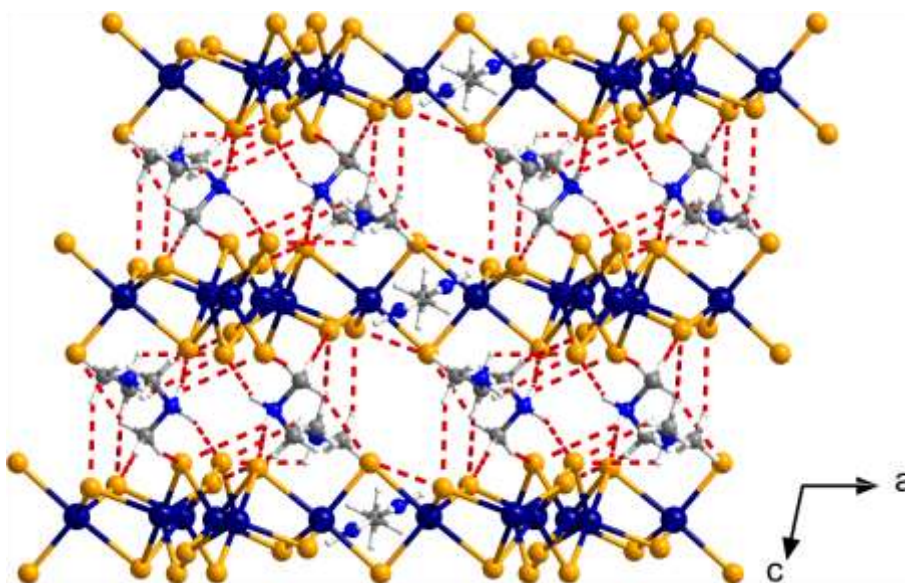

**Figure S18.** 3D supramolecular framework of **1** along the *b* axis (dashed lines represent the N-H...Se and C-H...Se hydrogen bonds). Color code: Sn (dark blue), Se (light orange), N (blue), C (gray), H (white).

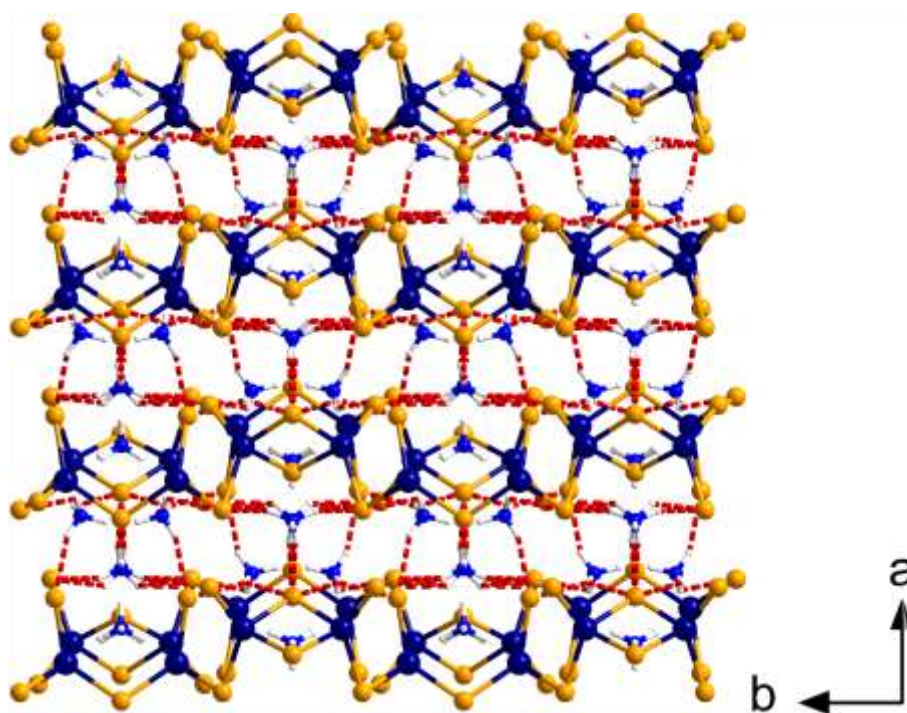

**Figure S19.** 3D supramolecular framework of **2** along the *c* axis (dashed lines represent the N-H...Se hydrogen bonds). Color code: Sn (dark blue), Se (light orange), N (blue), H (white).

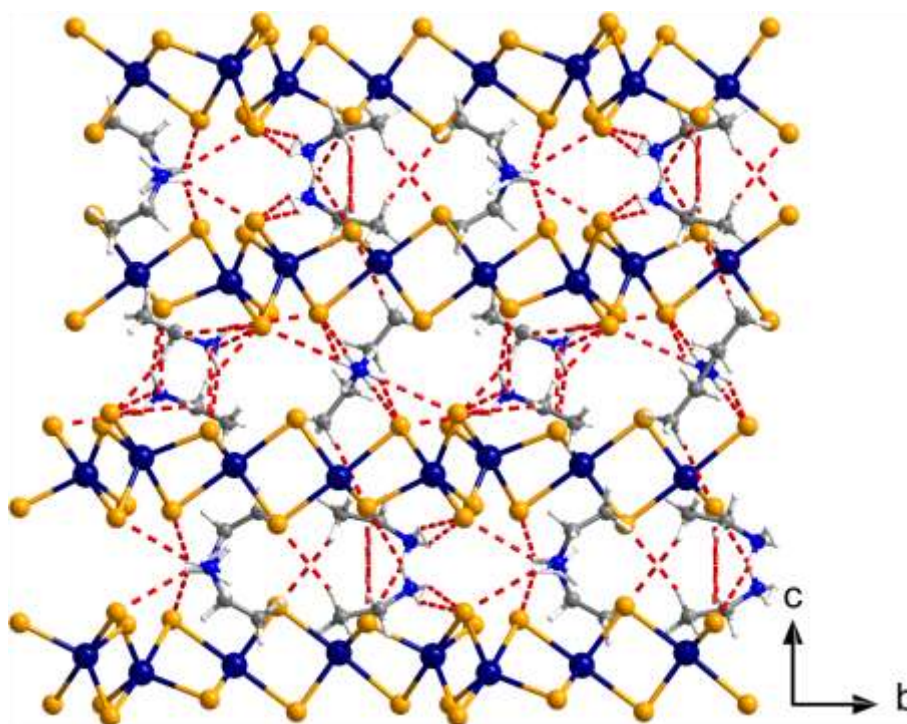

**Figure S20.** 3D supramolecular framework of **3** along the *a* axis (dashed lines represent the N–H···Se and C–H···Se hydrogen bonds). Color code: Sn (dark blue), Se (light orange), N (blue), C (gray), H (white).

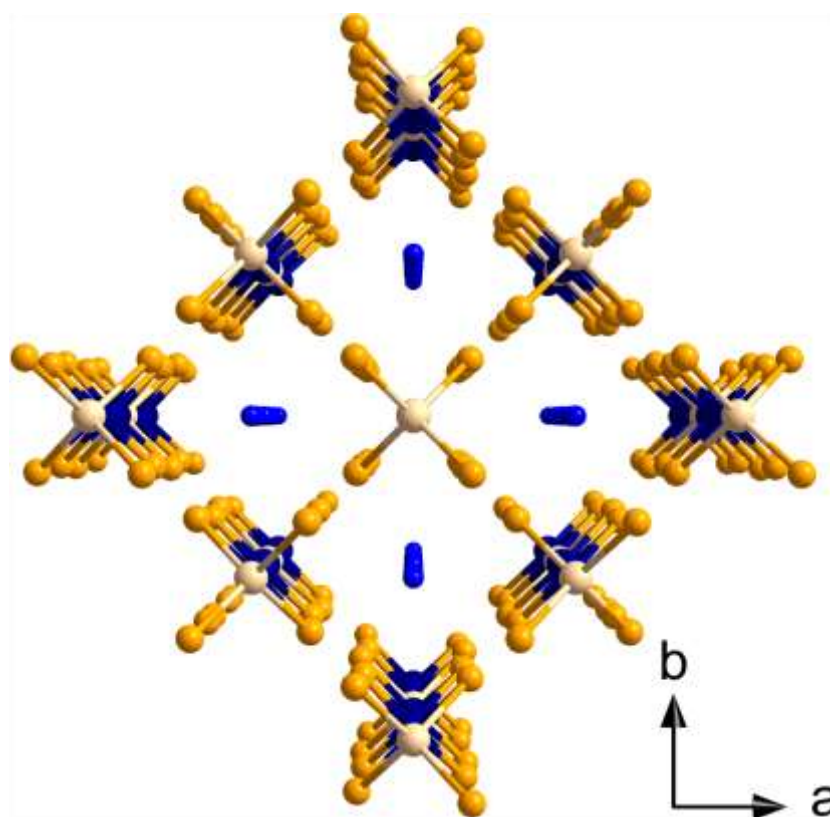

**Figure S21.** 3D supramolecular framework of **4** along the *c* axis. H atoms are omitted for clarity. Color code: Sn (dark blue), Ag (tan), Se (light orange), N (blue), C (gray).



## 2.3 Characterizations

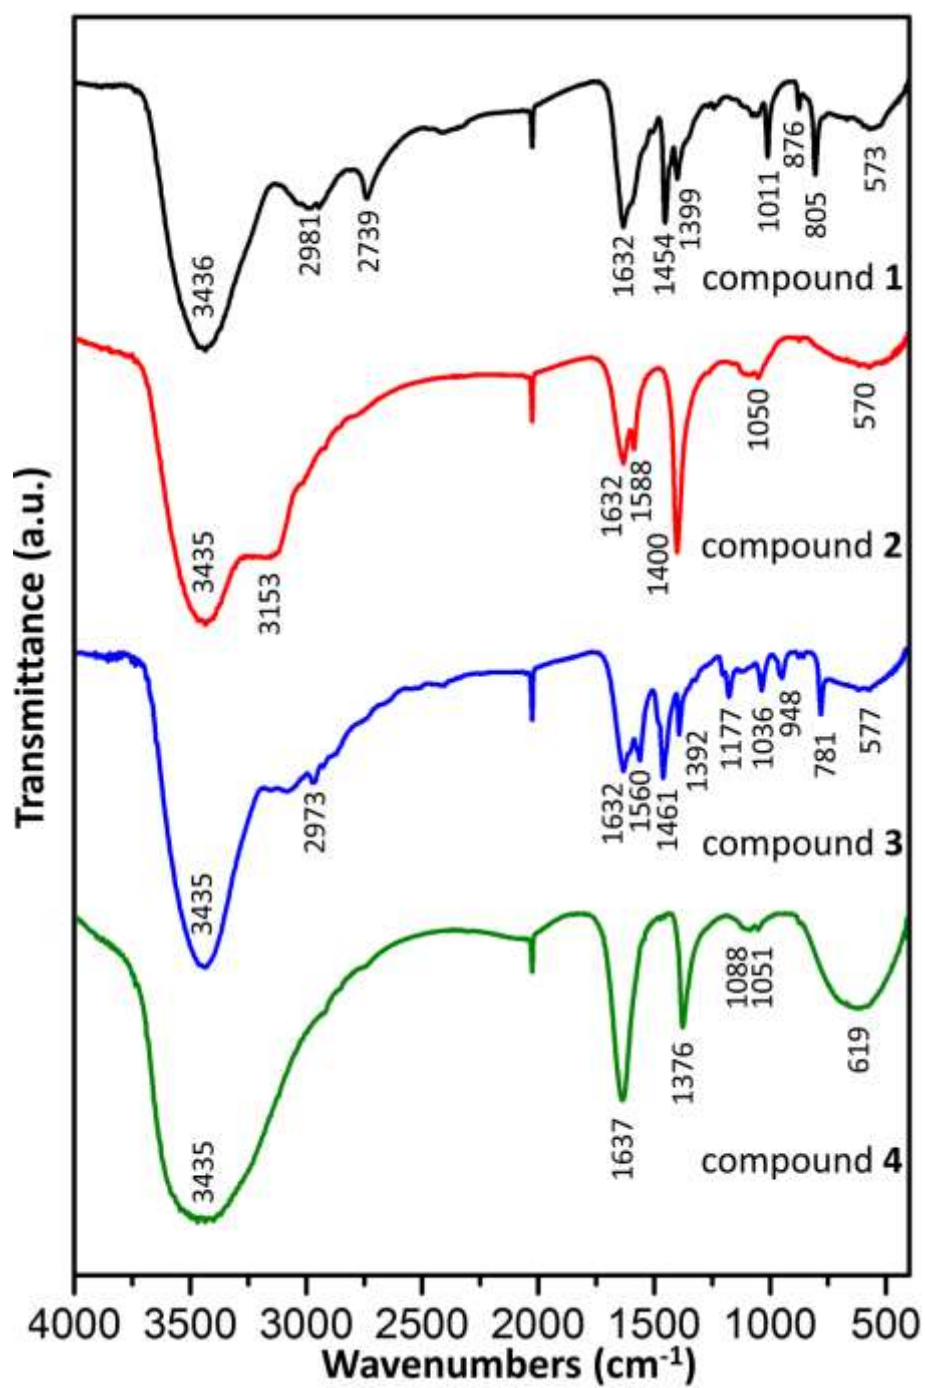

**Figure S22.** FTIR spectra of compounds **1-4** measured at room temperature on KBr pellets.

**(a)**  $[\text{NH}_2(\text{CH}_3)_2]\text{Cl}$

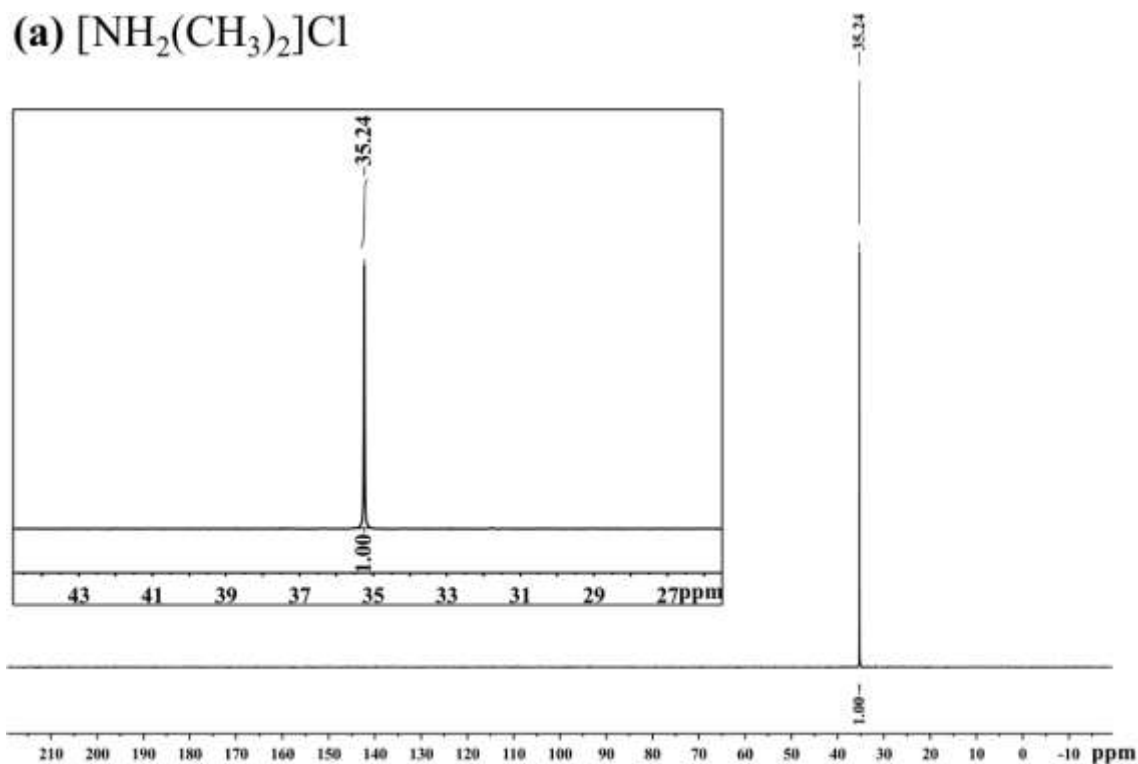

**(b)** compound **1**

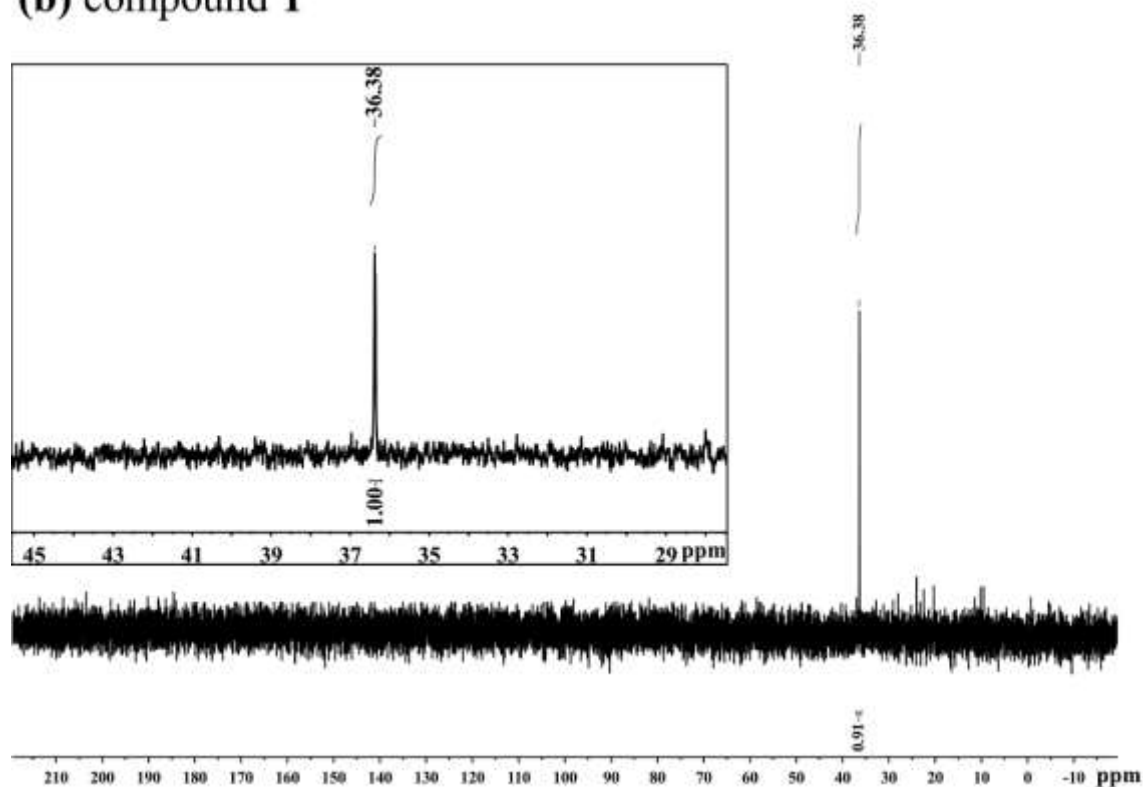

**Figure S23.**  $^{13}\text{C}$  NMR spectra of (a)  $[\text{NH}_2(\text{CH}_3)_2]\text{Cl}$  and (b) compound **1** dissolved in  $\text{N}_2\text{H}_4 \cdot \text{H}_2\text{O}$  (98%)/ $\text{D}_2\text{O}$  recorded at room temperature.



(a)  $[\text{NH}_3\text{CH}_2\text{CH}_3]\text{Cl}$

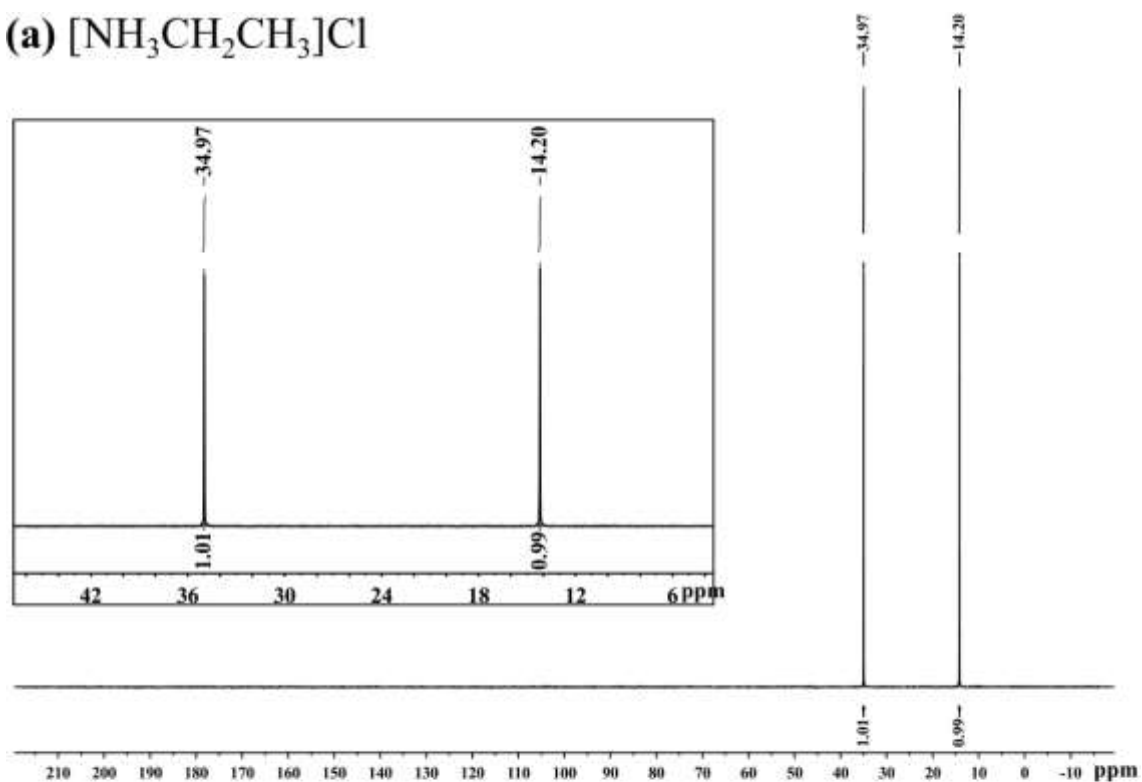

(b) compound **3**

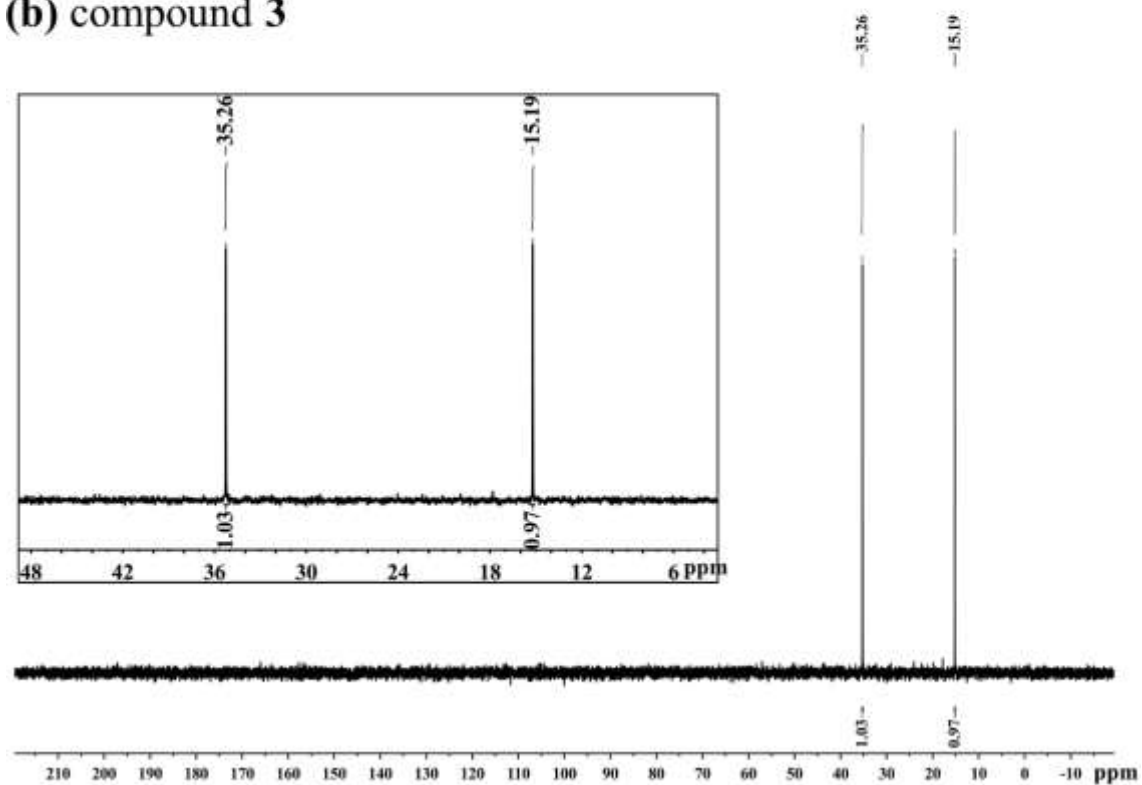

**Figure S24.**  $^{13}\text{C}$  NMR spectra of (a)  $[\text{NH}_3\text{CH}_2\text{CH}_3]\text{Cl}$  and (b) compound **3** dissolved in  $\text{N}_2\text{H}_4\cdot\text{H}_2\text{O}$  (98%)/ $\text{D}_2\text{O}$  recorded at room temperature.

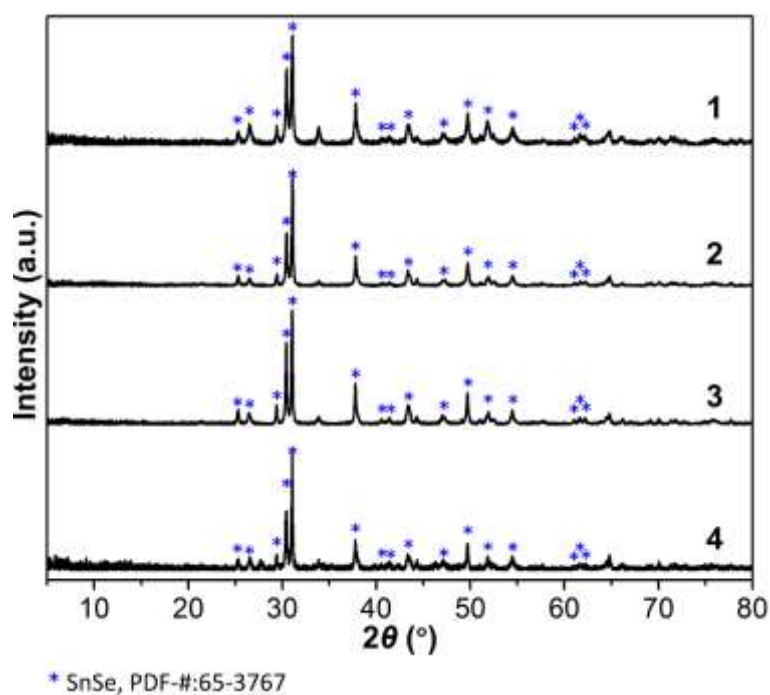

**Figure S25.** Powder XRD patterns for the TG residues of **1-4**.

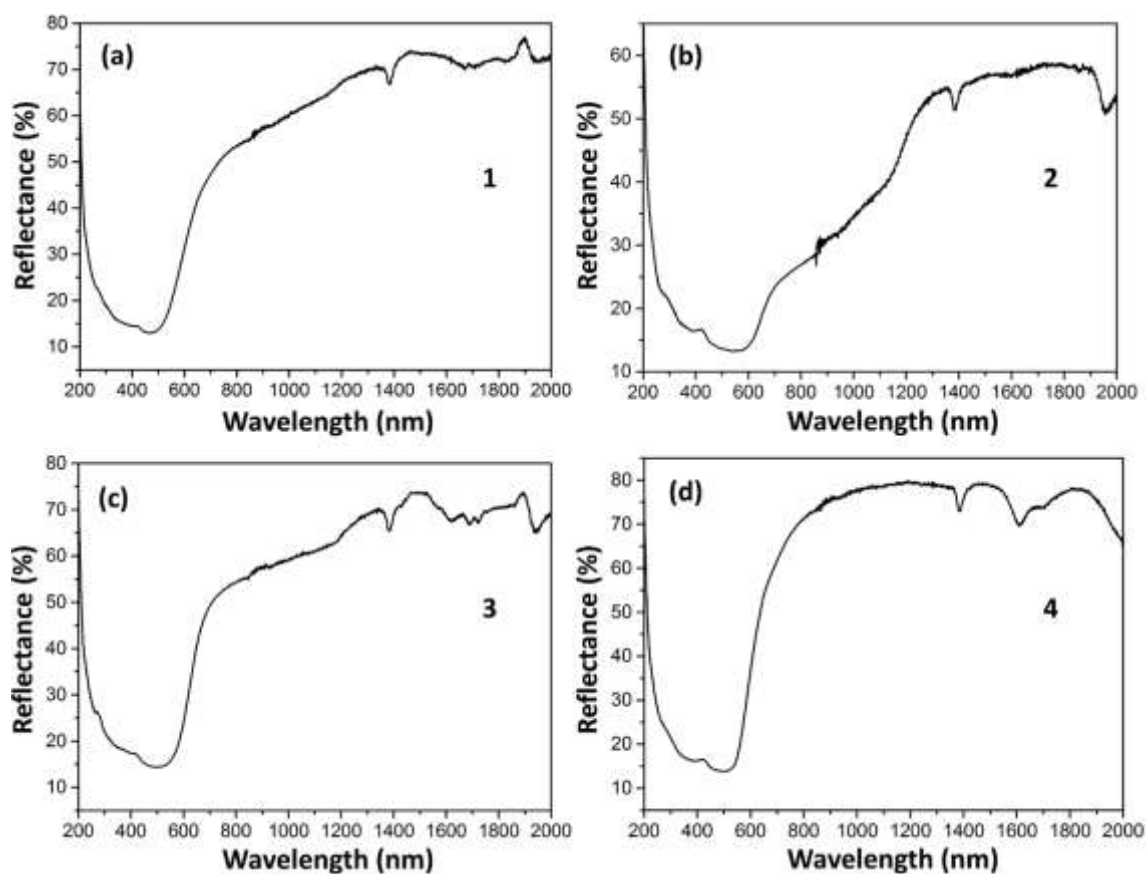

**Figure S26.** UV-vis reflectance spectra of compounds **1-4**.

## References:

- [1] W. S. Sheldrick, H.-G. Braunbeck, Preparation and crystal structure of  $\text{Cs}_2\text{Sn}_3\text{Se}_7$ , a cesium selenostannate(IV) with pentacoordinated Tin, *Z. Naturforsch. B* 1990, 45, 1643-1646.
- [2] W. S. Sheldrick, H. G. Braunbeck, Preparation and crystal structure of ethylenediammonium selenostannates(IV) and  $[\text{2SnSe}_2\cdot\text{en}]_\infty$ , *Z. Anorg. Allg. Chem.* 1993, 619, 1300-1306.
- [3] H. Aizari, G. A. Ozin, R. L. Bedard, S. Petrov, D. Young, Synthesis and Compositional Tuning of the Band Properties of Isostructural TMA- $\text{SnS}_x\text{Se}_{1-x}$ -1 Nanoporous Materials, *Adv. Mater.* 1995, 7, 370-374.
- [4] J. B. Parise, Y. Ko, K. Tan, D. M. Nellis, S. Koch, Structural evolution from tin sulfide (selenide) layered structures to novel 3- and 4-connected tin oxy-sulfides, *J. Solid State Chem.* 1995, 117, 219-228.
- [5] A. Fehlker, R. Blachnik, Synthesis, structure, and properties of some selenidostannates. II.  $[(\text{C}_2\text{H}_5)_3\text{NH}]_2\text{Sn}_3\text{Se}_7\cdot 0.25\text{H}_2\text{O}$  und  $[(\text{C}_3\text{H}_7)_2\text{NH}_2]_4\text{Sn}_4\text{Se}_{10}\cdot 4\text{H}_2\text{O}$ , *Z. Anorg. Allg. Chem.* 2001, 627, 1128-1134.
- [6] S. Lu, Y. Ke, J. Li, S. Zhou, X. Wu, W. Du, Solvothermal synthesis and structure of two 2D tin-selenides with long alkyldiamine  $\text{NH}_2(\text{CH}_2)_n\text{NH}_2$  ( $n = 8, 10$ ), *Struc. Chem.* 2003, 14, 637-642.
- [7] G.-H. Xu, C. Wang, P. Guo, Poly[[ (pentaethylenehexamine)manganese(II)] [hepta- $\mu$ -selenido-tritin(IV)]]: a tin-selenium net with remarkable flexibility, *Acta Cryst. C* 2009, 65, m171-m173.
- [8] G.-N. Liu, G.-C. Guo, M.-J. Zhang, J.-S. Guo, H.-Y. Zeng, J.-S. Huang, Different effects of a cotemplate and  $[(\text{transition-metal})(1,10\text{-phenanthroline})_m]^{2+}$  ( $m = 1-3$ ) complex cations on the self-assembly of a series of hybrid selenidostannates showing combined optical properties of organic and inorganic components, *Inorg. Chem.* 2011, 50, 9660-9669.
- [9] J.-R. Li, W.-W. Xiong, Z.-L. Xie, C.-F. Du, G.-D. Zou, X.-Y. Huang, From selenidostannates to silver-selenidostannate: structural variation of chalcogenidometallates synthesized in ionic liquids, *Chem. Comm.* 2013, 49, 181-183
- [10] W.-W. Xiong, J. Miao, K. Ye, Y. Wang, B. Liu, Q. Zhang, Threading chalcogenide layers with polymer chains, *Angew. Chem. Int. Ed.* 2015, 54, 546-550.
- [11] J. Lu, Y. Shen, F. Wang, C. Tang, Y. Zhang, D. Jia, Solvothermal syntheses and characterizations of selenidostannate salts of transition metal complex cations: conformational flexibility of the lamellar  $[\text{Sn}_3\text{Se}_7^{2-}]_n$  Anion, *Z. Anorg. Allg. Chem.* 2015, 641, 561-567.
- [12] S. Santner, S. Dehnen,  $[\text{M}_4\text{Sn}_4\text{Se}_{17}]^{10-}$  cluster anions ( $\text{M} = \text{Mn}, \text{Zn}, \text{Cd}$ ) in a  $\text{Cs}^+$  environment and as ternary precursors for ionothermal treatment, *Inorg. Chem.* 2015, 54, 1188-1190.
- [13] C.-F. Du, J.-R. Li, M.-L. Feng, G.-D. Zou, N.-N. Shen, X.-Y. Huang, Varied forms of lamellar  $[\text{Sn}_3\text{Se}_7]_n^{2n-}$  anion: the competitive and synergistic structure-directing effects of metal-amine complex and imidazolium cations, *Dalton Trans.* 2015, 44, 7364-7372.
- [14] D. D. Hu, Y. Y. Zhang, H. J. Yang, J. Lin, T. Wu, Structural transformation of selenidostannates from 1D to 0D and 2D via a stepwise amine-templated assembly strategy, *Dalton Trans.* 2017, 46, 7534-7539.
- [15] K.-Y. Wang, D. Ding, S. Zhang, Y. Wang, W. Liu, S. Wang, S.-H. Wang, D. Liu, C. Wang,

- Preparation of thermochromic selenidostannates in deep eutectic solvents, *Chem. Commun.*, 2018, 54, 4806-4809.
- [16] K.-W. Kim, M.-Y. Heo *Z. Kristallogr.-New Cryst. Struct.* **2018**, 233, 255-257.
- [17] X. Chen, X. Y. Huang, A. H. Fu, J. Li, L.-D. Zhang, H.-Y. Guo *Chem. Mater.*, 2000, **12**, 2385-2391.
- [18] H. Guo, Z. Li, L. Yang, P. Wang, X. Huang, J. Li *Acta Crystallogr. C: Cryst. Struct. Commun.*, 2001, **57**, 1237-1238.
- [19] L. D. Gulay, I. D. Olekseyuk, O. V. Parasyuk *J. Alloys Compd.*, 2002, **339**, 113-117.
- [20] A. Assoud, N. Soheilnia, H. Kleinke *Chem. Mater.*, 2005, **17**, 2255-2261.
- [21] M. Daszkiewicz, L. D. Gulay, A. Pietraszko, V. Y. Shemet *J. Solid State Chem.*, 2007, **180**, 2053-2060.
- [22] M. Ji, M. Baiyin, S. Ji, Y. An *Inorg. Chem. Commun.*, 2007, **10**, 555-557.
- [23] H. G. Yao, R.-C. Zhang, S.-H. Ji, M. Ji, Y. L. An, G. L. Ning *Inorg. Chem. Commun.*, 2010, **13**, 1296-1298.
- [24] J.-R. Li, X.-Y. Huang, *Dalton Trans.*, 2011, **40**, 4387-4390.
- [25] J.-R. Li, W.-W. Xiong, Z.-L. Xie, C.-F. Du, G.-D. Zou, X.-Y. Huang, *Chem. Commun.*, 2013, **49**, 181-183.
- [26] K.-Z. Du, X.-H. Qi, M.-L. Feng, J.-R. Li, X.-Z. Wang, C.-F. Du, G.-D. Zou, M. Wang, X.-Y. Huang *Inorg. Chem.*, 2016, **55**, 5110-5112.
- [27] B. Zhang, M.-L. Feng, J. Li, Q.-Q. Hu, X.-H. Qi, X.-Y. Huang *Cryst. Growth Des.*, 2017, **17**, 1235-1244.
